# Supplementary material for: The electrical behaviour of ultrafine bismuth phosphate particles under a range of temperature and frequency conditions
Source: Royal Society of Chemistry journal article supplement (doi:10.1039/d2dt00427e), 2022-01-01
Supplement: d2dt00427e1.pdf [file d2dt00427e1.pdf]

## Supplementary information

The electrical behaviour of the ultrafine bismuth phosphate particles under a range of temperature and frequency conditions

Sarit K Ghosh, Venkata Perla, Kaushik Mallick

Department of Chemical Sciences, University of Johannesburg, P.O. Box: 524, Auckland Park, 2006, South Africa.

**Table S1:** Raman active peaks ( $\nu_1$ -  $\nu_8$ ) of BPO and BPO nanoparticles within the frequency range from 40-1110  $\text{cm}^{-1}$ .

| Peaks Positions ( $\text{cm}^{-1}$ ) | $\nu_1$ | $\nu_2$ | $\nu_3$ | $\nu_4$ | $\nu_5$ | $\nu_6$ | $\nu_7$ | $\nu_8$ |
|--------------------------------------|---------|---------|---------|---------|---------|---------|---------|---------|
| BPO                                  | 69.3    | 116.5   | 165.3   | 243.2   | 269.6   | 361.8   | 430.7   | 1073.6  |

**Table S2:** Fitting parameters extracted from the equivalent circuit models for the BPO nanoparticle under different temperature condition.

| Temperature ( $^{\circ}\text{C}$ ) (BPO) | $R_g(\Omega) \times 10^6$ | $Q_g(\text{pF})$ | $\alpha_1$ | $R_{gb}(\Omega) \times 10^6$ | $Q_{gb}(\text{pF})$ | $\alpha_2$ | $W(\Omega/\sqrt{s})$ |
|------------------------------------------|---------------------------|------------------|------------|------------------------------|---------------------|------------|----------------------|
| 30                                       | 2.65                      | 33.2             | 0.97       | 525                          | 4.03                | 0.91       | 30.2                 |
| 40                                       | 2.54                      | 33.6             | 0.97       | 503                          | 4.15                | 0.89       | 32.0                 |
| 50                                       | 2.51                      | 34.1             | 0.98       | 488                          | 4.22                | 0.88       | 47.8                 |
| 60                                       | 2.41                      | 36.3             | 0.98       | 348                          | 4.34                | 0.86       | 52.3                 |
| 70                                       | 2.35                      | 38.2             | 0.98       | 285                          | 4.56                | 0.85       | 58.1                 |
| 80                                       | 2.32                      | 42.1             | 0.97       | 209                          | 4.91                | 0.83       | 63.4                 |

**Figure: S1**

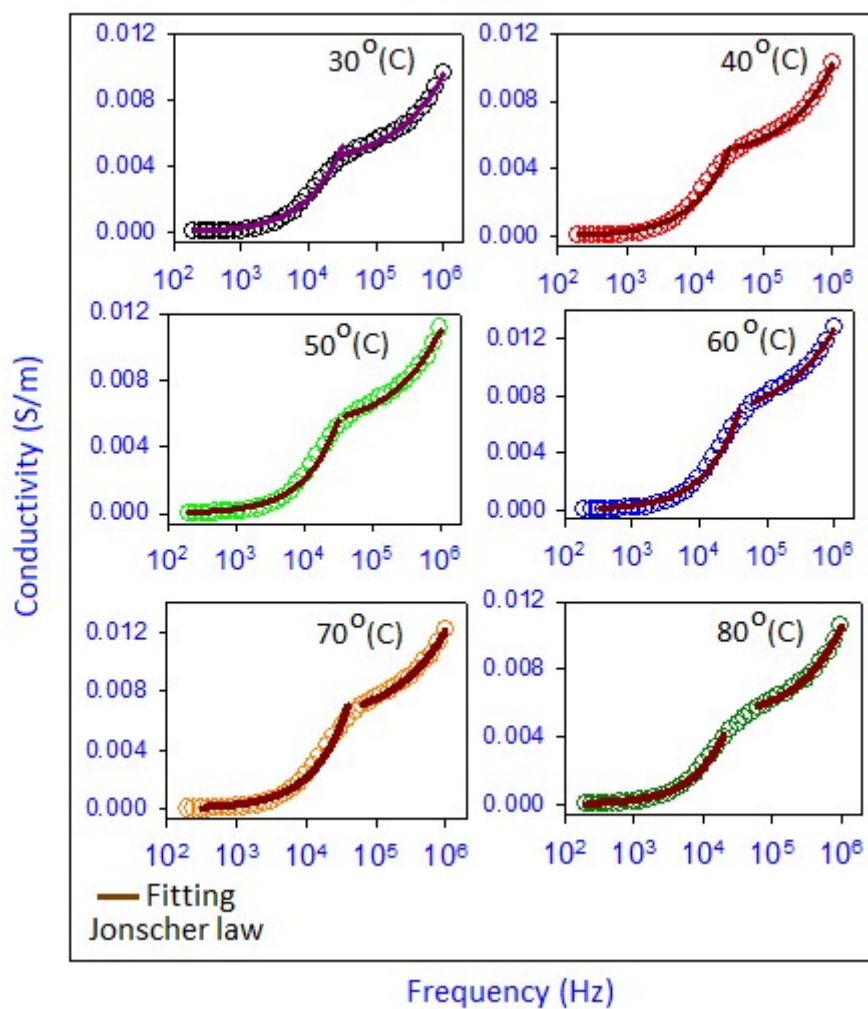

**Figure S1:** AC conductivity of bismuth phosphate nanoparticles measured under the temperature range from 30 to 80 °C. The solid red line is the fitting of the curve according to the Jonscher's equation.
